# Supplementary material
Source: bioRxiv or medRxiv preprint supplement (https://medrxiv.org/content/medrxiv/early/2021/09/27/2021.09.21.21263849/DC1/embed/media-1.pdf)
Supplement: Supplementary file [file media-1.pdf]

## Appendix 1. Search strategy

(coronavir\* OR coronavirus\* OR betacoronavir\* OR "beta-coronavirus" OR "beta-coronaviruses" OR "corona virus" OR "virus corona" OR "corono virus" OR "virus corono" OR hcov\* OR covid\* OR "2019-ncov" OR cv19\* OR "cv-19" OR "cv 19" OR "n-cov" OR ncov\* OR (wuhan\* AND (virus OR viruses OR viral)) OR "2019-ncov-related" OR "cv-19-related" OR "n-cov-related" OR sars\* OR sari OR "severe acute respiratory syndrome" OR antisars\* OR "anti-sars-cov-2" OR "anti-sars-cov2" OR "anti-sarscov-2" OR "anti-sarscov-2" OR "post-COVID-19" OR "Not-of-COVID-19" OR "corona patients" OR "article-covid-19" OR "post-covid-19" OR "post-covid" OR "with-covid-19" OR "pre-covid" OR "pre-covid-19" OR "with-covid" OR "anti-covid-19" OR "n-covid" OR "no-covid") OR ("Anti-SARS-CoV-2" OR "anti-spike" OR antispikes\* OR "anti-spike" OR "REGN-10933" OR "REGN 10933" OR REGN10933\* OR "REGN-10987" OR "REGN 10987" OR REGN10987\*) OR (BNT162\* OR "BNT-162" OR "BNT 162" OR "BNT-162-b2" OR "BNT-162b2" OR "BNT 162b2" OR tozinameran\* OR Comirnaty\* OR ((pfizer\* OR biontech\*) AND vaccine\*) OR "mRNA-1273" OR "mRNA 1273" OR mRNA1273\* OR (moderna AND vaccine\*) OR "CX-024414" OR "CX 024414" OR CX024414 OR "TAK-919" OR "TAK 919" OR TAK919\* OR "mRNA-1273.351" OR "CVnCoV" OR MRT5500\* OR "MRT-5500" OR "MRT 5500" OR VAW00001\* OR "VAW-00001" OR "VAW 00001" OR (sanofi\* AND vaccine\*) OR "AG0302-COVID19" OR "ZyCoV-D" OR "INO-4800" OR Ad26COV\* OR Ad26\* OR "jnj-78436735" OR "jnj 78436735" OR jnj78436735\* OR ((johnson\* OR j&J OR janssen\*) AND vaccine\*) OR VAC31518\* OR "VAC-31518" OR "VAC-31518" OR ChAdOx1\* OR AZD1222\* OR "AZD 1222" OR "AZD-1222" OR ((Oxford\* OR Astra\* OR "SK Bio") AND vaccin\*) OR Covishield\* OR Vaxzevria\* OR (covishield\* AND vaccin\*) OR COH04S1\* OR "Gam-COVID-Vac" OR "Gam COVID Vac" OR GamCOVIDVac\* OR sputnik\* OR (gamaleya\* AND vaccine\*) OR "Ad5-nCoV" OR "Ad5 nCoV" OR Ad5nCoV\* OR Convidecia\* OR Convidicea\* OR Convidicia\* OR Convidicea\* OR (cansino AND vaccin\*) OR "AV-COVID-19" OR "GRAd-COV2" OR SCB2019\* OR SCB-2019 OR "SCB 2019" OR "RBD-Dimer" OR "RBD Dimer" OR (recombinant\* AND coronavirus AND CHO) OR NVXCoV2373\* OR "NVX-CoV2373" OR "NVX CoV2373" OR TAK-019 OR "TAK 019" OR TAK019\* OR (Novavax\* AND vaccine\*) OR EpiVacCorona\* OR "Plant-based VLP" OR CoronaVac\* OR PiCoVacc\* OR (sinovac\* AND vaccine\*) OR (BBIBP\* OR (sinopharm\* AND vaccine\*)) OR Covaxin OR "BBV 152" OR "BBV-152" OR BBV152\* OR (Bharat\* AND vaccine\*) OR ((Sinopharm\* AND wuhan AND vaccine\*)) OR "QazCovid-in" OR VLA2001 OR "ERUCOV-VAC" OR ((sanofi\* OR gsk) AND vaccine\*))
